# Supplementary material for: CK2α' Drives Lung Cancer Metastasis by Targeting BRMS1 Nuclear Export and Degradation
Source: Oxford University Press journal article supplement (doi:10.1158/0008-5472.can-15-2888), 2016-03-16
Supplement: 00085472can152888-sup-156907_1_supp_3332179_j1pxqj.docx [file 00085472can152888-sup-156907_1_supp_3332179_j1pxqj.docx]

Supplementary Table: Patient Demographics

| **Variable** | **Overall, N=160** | **Adenocarcinoma, N=80** | **Squamous cell, N=80** | ***P*** |
| --- | --- | --- | --- | --- |
| Age, years, median (range) | 69 (36-88) | 71 (36-88) | 68 (47-84) | 0.22 |
| Sex |  |  |  | 0.08 |
| Male | 81 | 34 | 47 |  |
| Female | 79 | 45 | 34 |  |
| Smoking pack-years, median (range) | 45 (0-150) | 40 (0-140) | 45 (10-150) | 0.11 |
| Pathologic tumor stage |  |  |  | 0.93 |
| IA | 51 | 30 | 21 |  |
| IB | 39 | 14 | 25 |  |
| IIA | 13 | 8 | 5 |  |
| IIB | 26 | 11 | 15 |  |
| IIIA | 15 | 9 | 6 |  |
| IIIB | 9 | 5 | 4 |  |
| IV | 2 | 0 | 2 |  |
| Unknown | 5 | 3 | 2 |  |
| Recurrence |  |  |  | 0.016* |
| No | 118 | 53 | 65 |  |
| Yes | 26 | 19 | 7 |  |
| Unknown | 16 | 8 | 8 |  |
| Nodal metastasis |  |  |  | 0.73 |
| Positive | 48 | 23 | 25 |  |
| Negative | 103 | 53 | 50 |  |
| Unknown | 9 | 4 | 5 |  |

*P=0.016 (Fisher’s exact test)
